# Supplementary material for: Human Corneal Expression of SLC4A11, a Gene Mutated in Endothelial Corneal Dystrophies
Source: PubMed Central journal article supplement (PMC6609610; doi:10.1038/s41598-019-46094-y), 2019-07-04
Supplement: 41598_2019_46094_MOESM1_ESM.pdf [file 41598_2019_46094_MOESM1_ESM.pdf]

## Supplementary Information

### Human Corneal Expression of SLC4A11, a Gene Mutated in Endothelial Corneal Dystrophies

Darpan Malhotra<sup>1</sup>, Sampath K. Loganathan<sup>1,2</sup>, Anthony M. Chiu<sup>1</sup>, Chris M. Lukowski<sup>1</sup> and Joseph R. Casey<sup>1#</sup>

<sup>1</sup>Department of Biochemistry, Membrane Protein Disease Research Group, University of Alberta, Edmonton, Alberta, T6G 2H7, Canada.

<sup>2</sup>Present address: Lunenfeld-Tanenbaum Research Institute, Toronto, Ontario, Canada  
M5G 1X5

#Address Correspondence to:

Dr. Joseph R. Casey

Department of Biochemistry

University of Alberta

Edmonton, Alberta, Canada T6G 2H7

Phone: (780) 492-7203

Email: [joe.casey@ualberta.ca](mailto:joe.casey@ualberta.ca)

URL: <http://www2.biochem.ualberta.ca/CaseyLab/index.php>

## SUPPLEMENTARY FIGURE LEGENDS

**Supplementary Figure S1. Detection ratio of SLC4A11-common antibody vs. SLC4A11-v3 antibody for SLC4A11 v3 protein.** HEK293 cells transfected with cDNA encoding SLC4A11 v3 were processed for immunoblots. 5  $\mu$ g, 10  $\mu$ g and 20  $\mu$ g of cell lysate was loaded in duplicates. Blots were probed with SLC4A11-common antibody ( $\alpha$ -common) and SLC4A11-v3 ( $\alpha$ -v3) antibody. Densitometry quantified the band intensities. Ratio of SLC4A11 band intensity from  $\alpha$ -common and  $\alpha$ -v3 antibodies was calculated for each amount of total lysate and plotted. Data represent mean  $\pm$  SEM from three replicates.

**Supplementary Figure S2. Alternative homology model of SLC4A11 v2-M36 and SLC4A11 v3 cytoplasmic domains.** Homology models of cytoplasmic domains of (A) SLC4A11 v2-M36 and (B) SLC4A11 v3 generated by Phyre2 fold recognition software, using crystal structure of human erythrocyte Band 3 cytoplasmic domain (PDB: 1HYN) as the template. Unique N-terminal sequence of v3 is highlighted in pink. (C) v2-M36 and v3 models aligned in PyMOL (molecular graphics system version 2.0.7), using segments that were modelled with 100% confidence (R90-P306 for v2-M36, R109-P325 for v3).  $N_{v2}$ ,  $N_{v3}$  and  $C_{v2}$ ,  $C_{v3}$  are the N and C termini for v2-M36 and v3, respectively.

**Supplementary Figure S3. Full-length immunoblot images for the data presented in Figure 3.** Blots 1 and 2 were probed with  $\alpha$ -SLC4A11-common and  $\alpha$ -SLC4A11-v3 antibodies, respectively. Blots probed with  $\alpha$ -GAPDH antibody are presented below their

respective samples. Intervening lanes to the left of human cornea lane are shown. MW:  
Molecular weight.

**Supplementary Figure S4. Full-length immunoblot images for the data presented in  
Figure 5A.**

**Supplementary Figure S5. Full-length immunoblot images for the data presented in  
Figure 6A.**

## SUPPLEMENTARY TABLES

**Supplementary Table S1. Primers for reverse transcription PCR amplification of SLC4A11 transcripts.**

|                      | <b>Forward Primer</b>      | <b>Reverse Primer</b>       | <b>Product Size (bp)</b> |
|----------------------|----------------------------|-----------------------------|--------------------------|
| SLC4A11<br>Variant 1 | 5'-GGGCAGGGTTTTCTCAGGAA-3' | 5'-CATTCTCAGTGTTGGTGGCCT-3' | 244                      |
| SLC4A11<br>Variant 2 | 5'-GGCTGGTGACCTTTCTGCTT-3' | 5'-CATTCTCAGTGTTGGTGGCCT-3' | 233                      |
| SLC4A11<br>Variant 3 | 5'-CAGGCGCGTGTTCCATCTG-3'  | 5'-CATTCTCAGTGTTGGTGGCCT-3' | 233                      |
| GAPDH                | 5'-CAGCCTCAAGATCATCAGCA-3' | 5'-TGTGGTCATGAGTCCTTCCA-3'  | 106                      |

**Supplementary Table S2. Review of Human SLC4A11 Variants used in studies from 2001-2019.** Studies using different SLC4A11 variants since 2001. Indicated citations can be found in the main references.

| <b>SLC4A11 Variant used</b> | <b>Literature Citations with Reference Numbers in Manuscript</b>                                                                                                                                                                                                                                                                                                                                                                                                                                                                                                                                                                                                                                                               |
|-----------------------------|--------------------------------------------------------------------------------------------------------------------------------------------------------------------------------------------------------------------------------------------------------------------------------------------------------------------------------------------------------------------------------------------------------------------------------------------------------------------------------------------------------------------------------------------------------------------------------------------------------------------------------------------------------------------------------------------------------------------------------|
| v1                          | Zhang <i>et al.</i> (2015) <sup>20</sup>                                                                                                                                                                                                                                                                                                                                                                                                                                                                                                                                                                                                                                                                                       |
| v2-M1                       | Parker <i>et al.</i> (2001) <sup>44</sup> , Park <i>et al.</i> (2004) <sup>23</sup> , Vithana <i>et al.</i> (2006) <sup>10</sup> , Riazuddin <i>et al.</i> (2010) <sup>5</sup> , Vilas <i>et al.</i> (2011) <sup>29</sup> , Vilas <i>et al.</i> (2012) <sup>28</sup> , Jalimarada <i>et al.</i> (2013) <sup>16</sup> , Vilas <i>et al.</i> (2013) <sup>14</sup> , Ogando <i>et al.</i> (2013) <sup>17</sup> , Loganathan <i>et al.</i> (2014) <sup>15</sup> , Soumittra <i>et al.</i> (2014) <sup>27</sup> , Roy <i>et al.</i> (2015) <sup>45</sup> , Loganathan <i>et al.</i> (2016) <sup>26</sup> , Kao <i>et al.</i> (2016) <sup>46</sup> , Guha <i>et al.</i> (2017) <sup>47</sup> , Li <i>et al.</i> (2019) <sup>25</sup> |
| v2-M36                      | Chiu <i>et al.</i> (2016) <sup>48</sup> , Loganathan <i>et al.</i> (2016) <sup>21</sup> , Badior <i>et al.</i> (2017) <sup>49</sup> , Alka <i>et al.</i> (2018a) <sup>24</sup> , Alka <i>et al.</i> (2018b) <sup>50</sup>                                                                                                                                                                                                                                                                                                                                                                                                                                                                                                      |
| v3                          | Kao <i>et al.</i> (2015) <sup>18</sup> , Kao <i>et al.</i> (2016) <sup>46</sup>                                                                                                                                                                                                                                                                                                                                                                                                                                                                                                                                                                                                                                                |

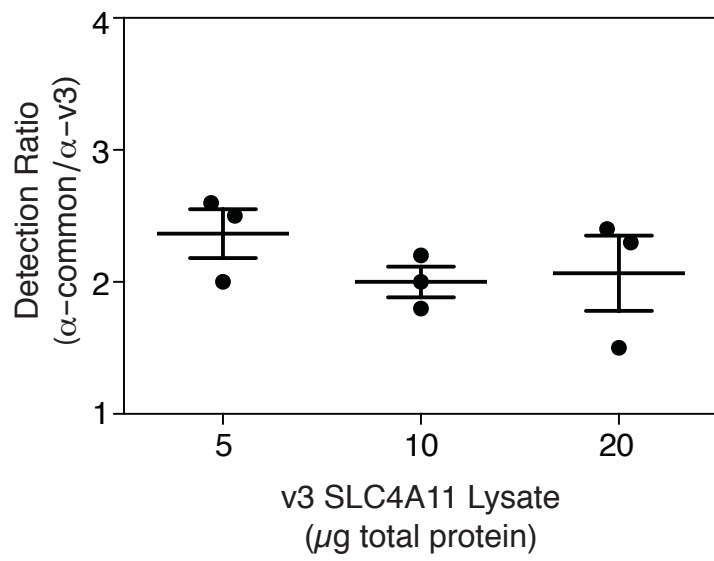

Supplementary Figure S1

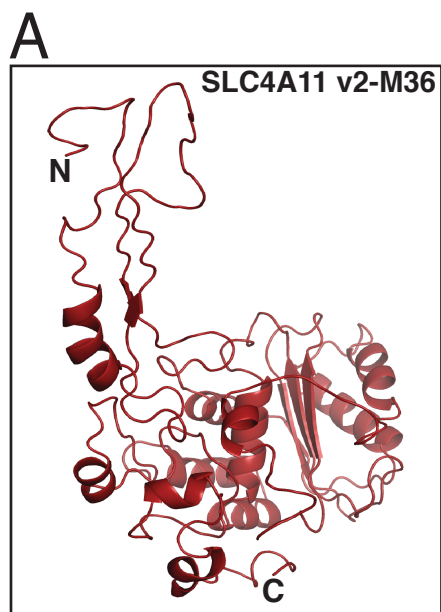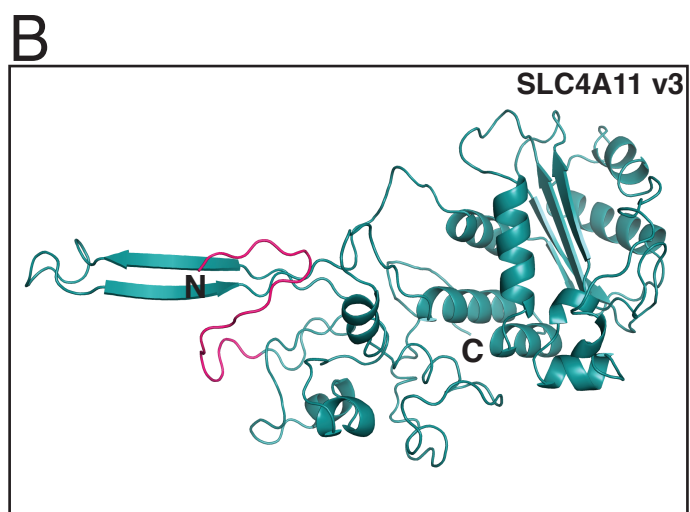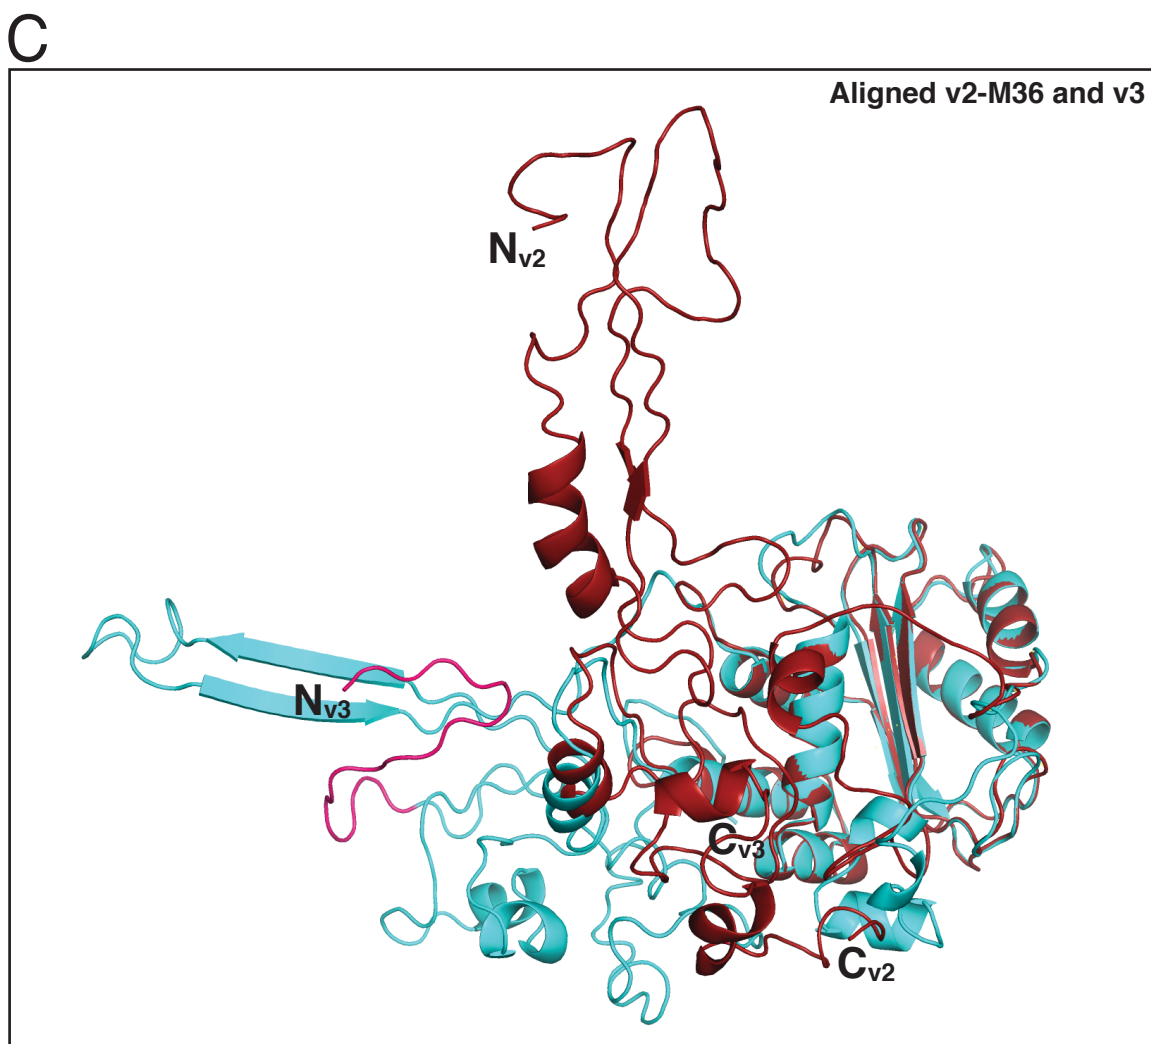

Supplementary Figure S2

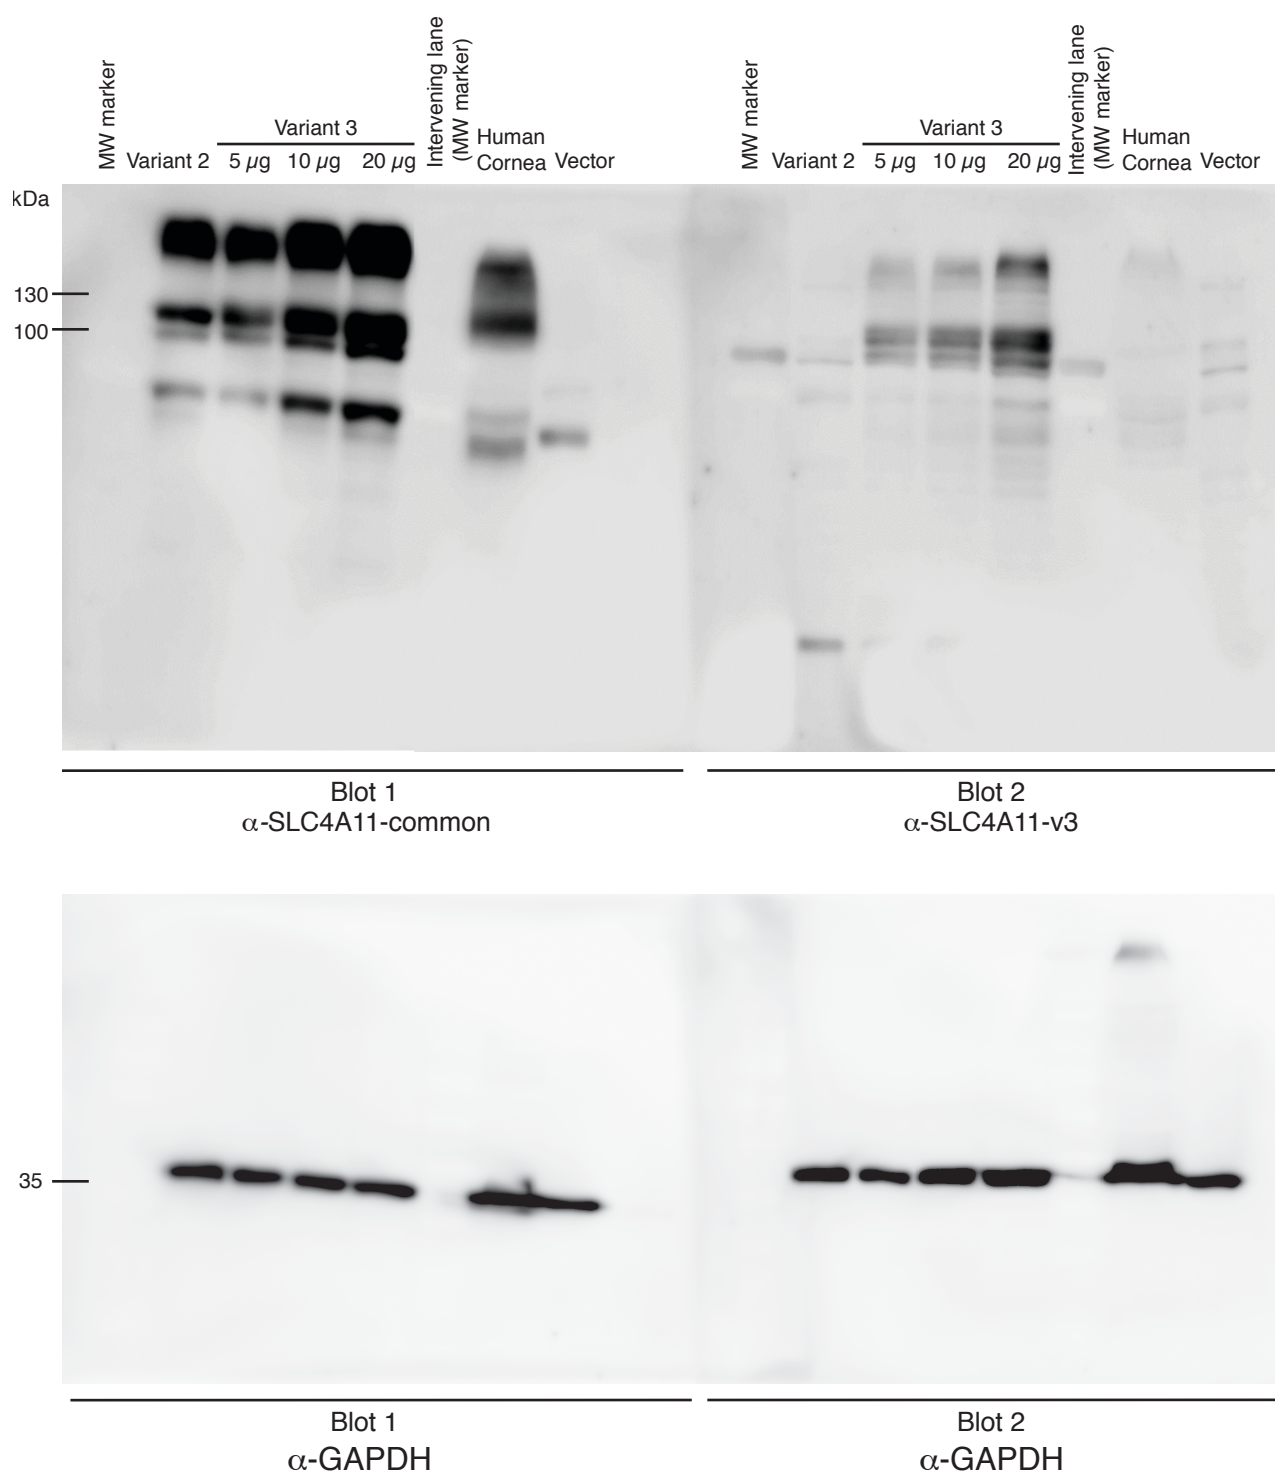

Supplementary Figure S3



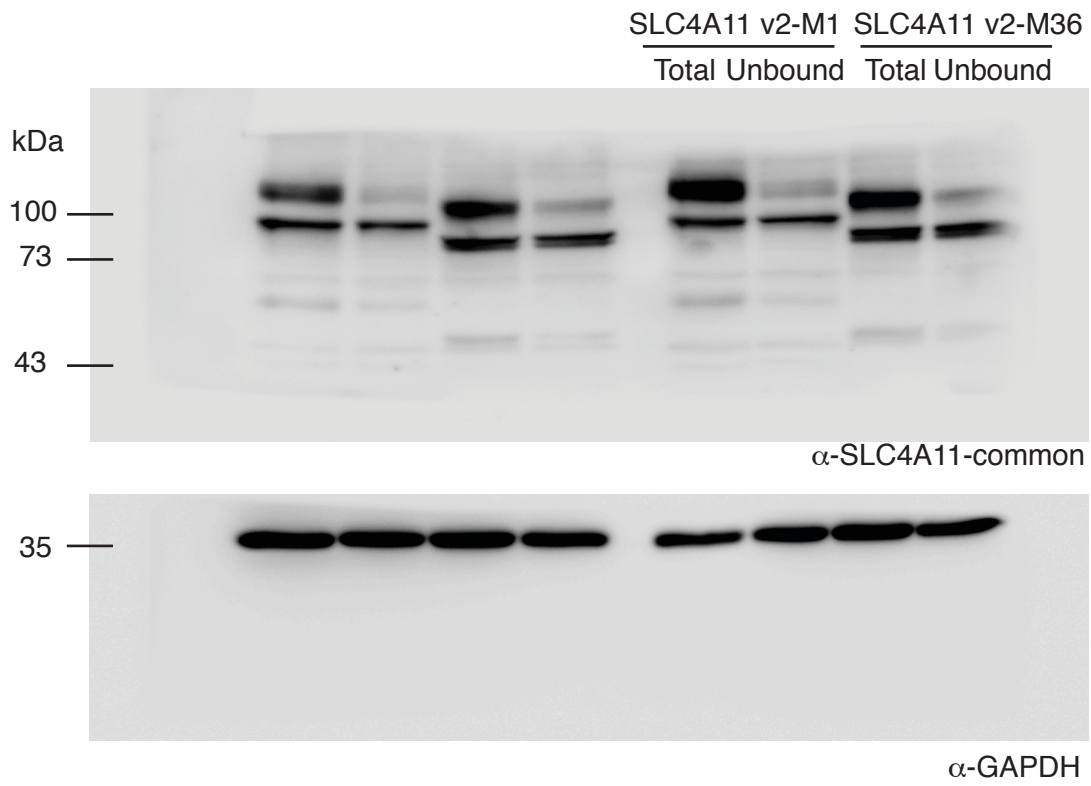

Supplementary Figure S4

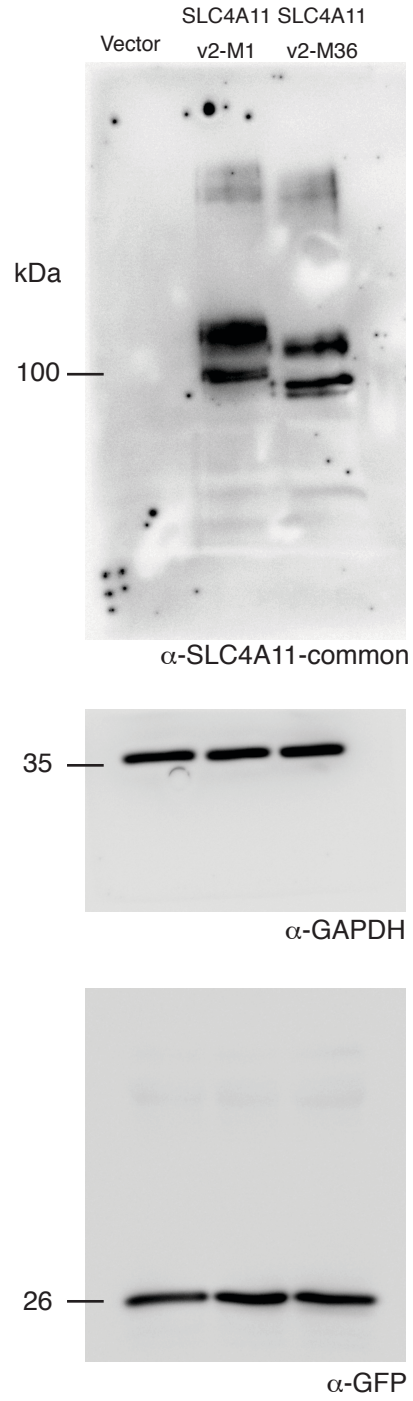

Supplementary Figure S5
